# Supplementary material for: Size-Based Effects of Anthropogenic Ultrafine Particles on Lysosomal TRPML1 Channel and Autophagy in Motoneuron-like Cells
Source: MDPI journal article supplement (doi:10.3390/ijms232113041), 2022-10-27
Supplement: s1 [file s1]

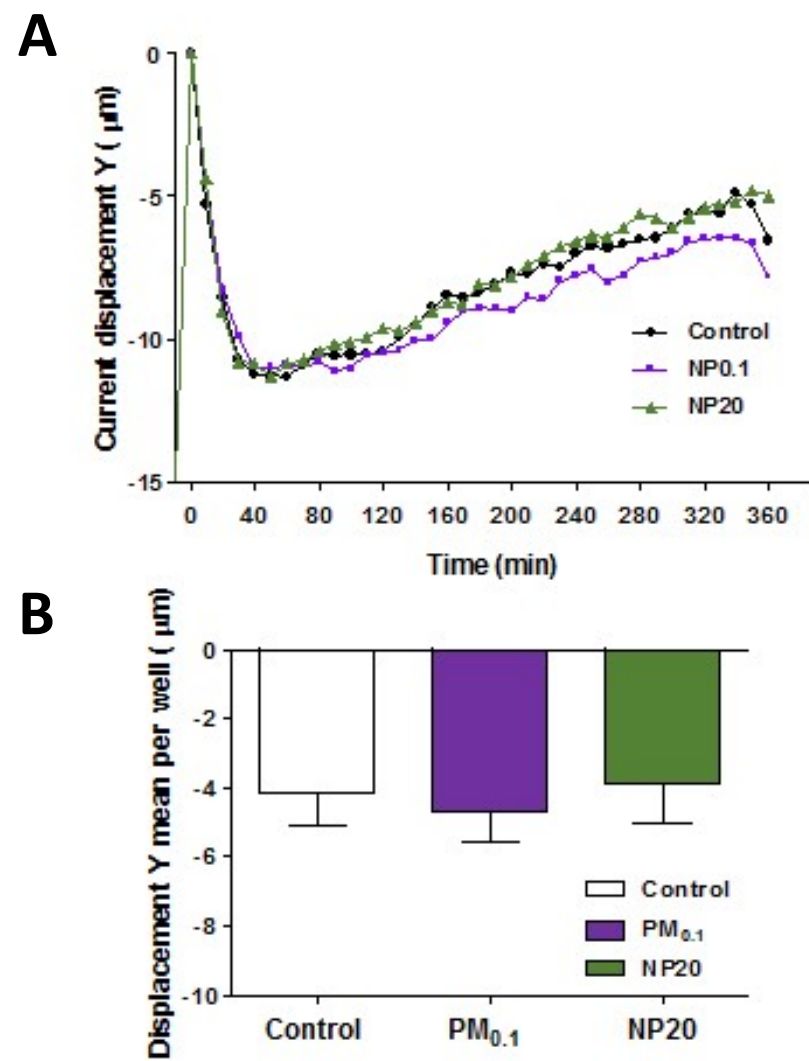

Figure S1

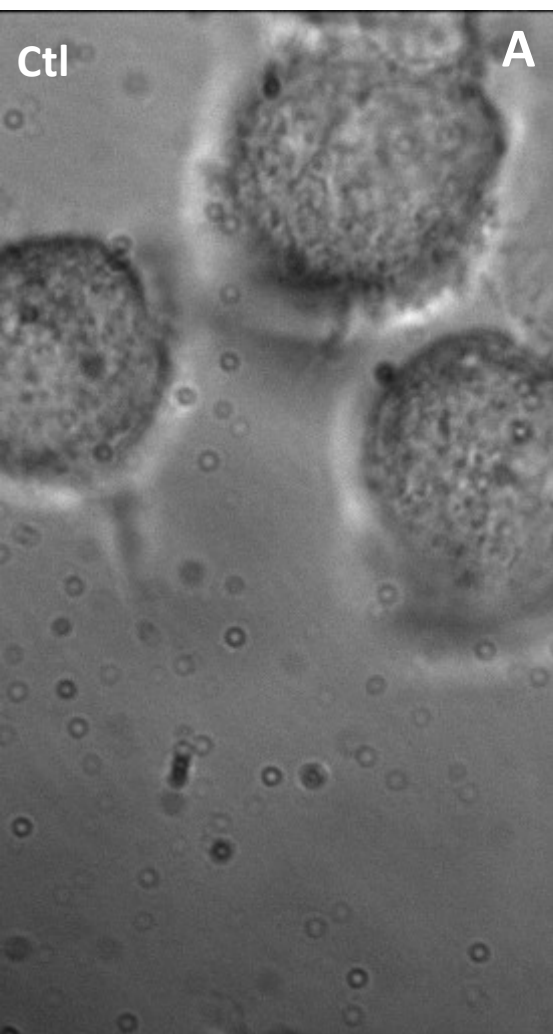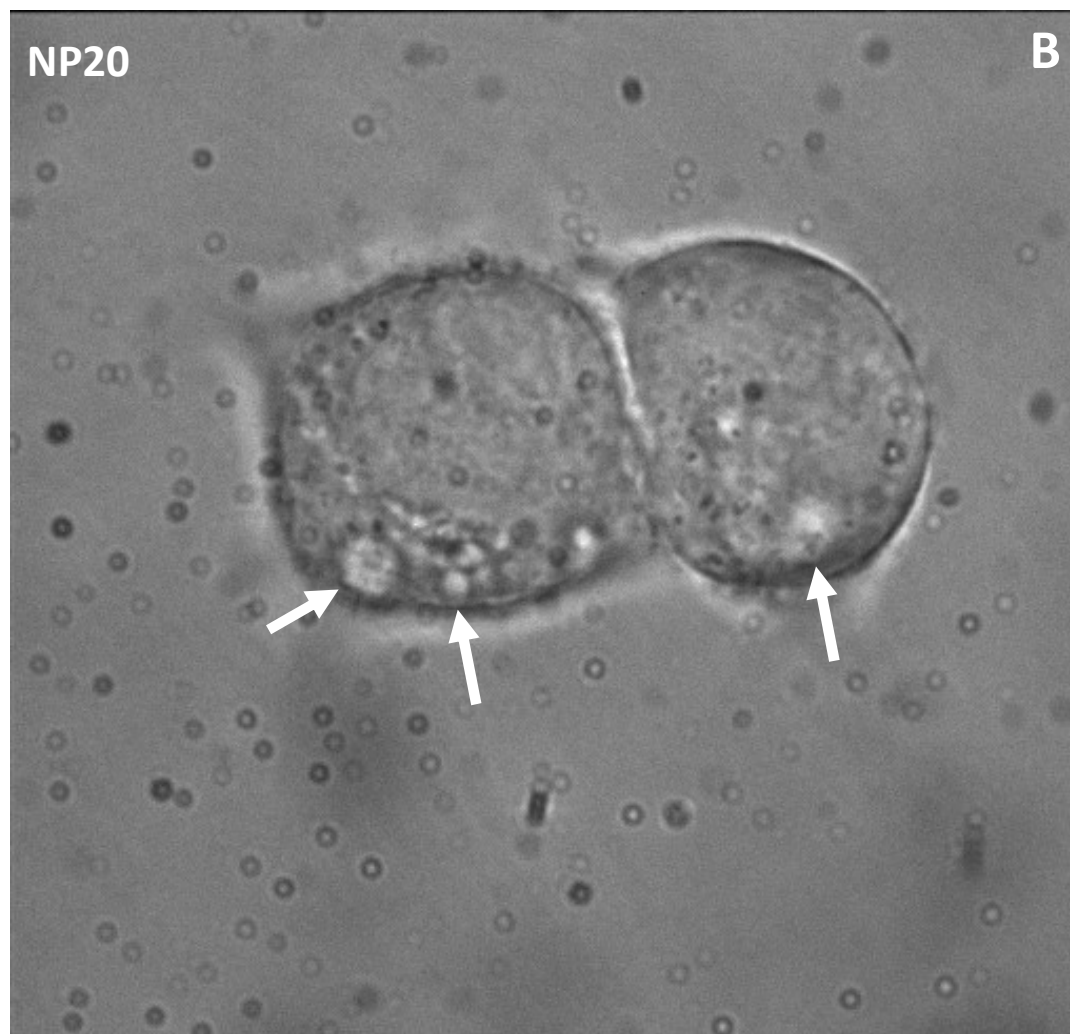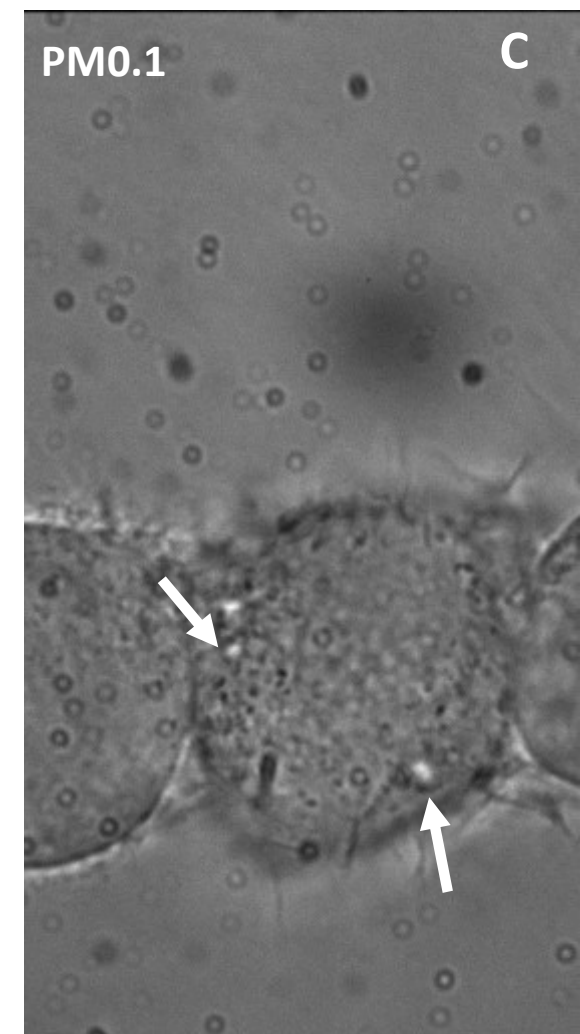

**Figure S2**

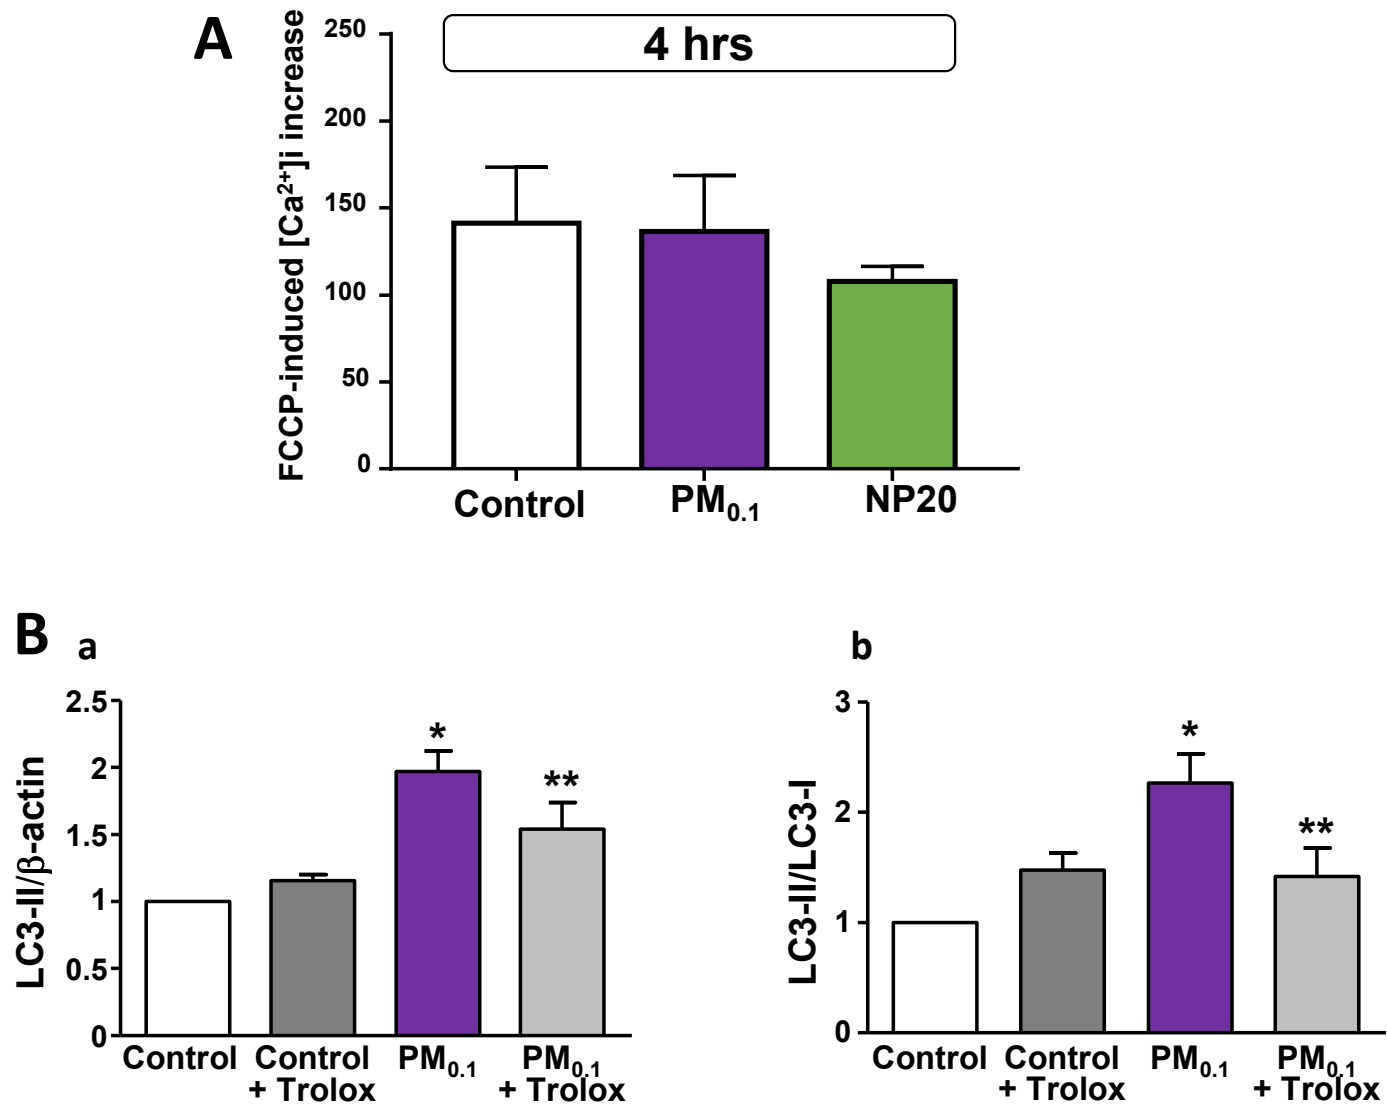

Figure S3

**Figure S1 Effects of PM0.1 and NP20 on the current displacement Y.** A-B Tracking characteristics (current displacement Y in A, and displacement Y mean per well in B. NSC-34 ( $150 \times 10^3$  cells/well) were stimulated (6 hours,  $37^\circ \text{C}$ ) with DMEM alone (Control), PM0.1 (2,86 ppm) and NP20 (0,71 ppm). The incubation time was carried out in time-lapse and high-content microscopy Operetta High-Content Imaging System (PerkinElmer) per well.

**Figure S2 Endocytosis in NSC-34 motor neurons exposed to PM0.1 and NP20.** A-C Representative images in brightfield of NSC-34 ( $150 \times 10^3$  cells/well) exposed for 3 hours to PM0.1 (2,86 ppm) and NP20 (0,71 ppm).

**Figure S3 Effect of PM0.1 and NP20 on mitochondrial dysfunction and LC3 in NSC-34 motor neurons.** A Bar graph representing the quantification of the effect of acute exposure to FCCP on  $[\text{Ca}^{2+}]_i$  after treatment with PM0.1 and NP20 for 4 hours. For each group at least  $n=15$  cells were detected. B Representative quantification of LC3-I/LC3-II expression in NSC-34 motor neurons exposed to PM0.1 (48 hrs) in the presence of trolox. Each bar represents the mean  $\pm$  S.E. of data obtained from three different sessions. \* $p < 0.01$  vs control, \*\* $p < 0.01$  vs PM0.1 alone.
